# Supplementary material for: Diverse sensor responses from two functionalized tris(phthalocyaninato)europium ambipolar semiconductors towards three oxidative and reductive gases
Source: Royal Society of Chemistry journal article supplement (doi:10.1039/c8tc05673k), 2018-12-06
Supplement: c8tc05673k1.pdf [file c8tc05673k1.pdf]

Electronic supplementary information

**Diverse sensor responses from two functionalized  
tris(phthalocyaninato) Europium ambipolar semiconductors  
towards three oxidative and reductive gases**

Shanshan Liu,<sup>a</sup> Haoyuan Wang,<sup>a</sup> Xiangyang Wang,<sup>a</sup> Shaoren Li,<sup>a</sup> Heyuan Liu,<sup>a</sup>

Yanli Chen,<sup>\*a</sup> Xiyou Li<sup>\*a</sup>

<sup>a</sup> College of Science, China University of Petroleum (East China), Qingdao 266580, China.

*Corresponding Author*

*\*E-mail: yanlichen@upc.edu.cn (Y. Chen) and xiyouli@upc.edu.cn (X. Li)*

## Caption of Content

**Fig.S1.** Experimental isotopic pattern for the molecular ion of compounds **1-2** shown in the MALDI-TOF mass spectrum.

**Fig.S2.**  $^1\text{H}$  NMR spectrum of compounds **1-2** in  $\text{CDCl}_3$ .

**Fig.S3.** The molecular dimension of compounds **1-2** obtained using PCMODEL for windows Version 6.0, Serena Software.

**Fig.S4.** Polarized UV-vis spectra of the LS films of **1-2**.

**Fig.S5.** XRD pattern recorded in in-plane (grazing incidence) mode for the LS films of **1(A)-2(B)**.

**Fig.S6.** Output characteristics ( $I_{\text{ds}}$  vs.  $V_{\text{ds}}$ ) of ambipolar OFET device based on LS films of **1 (A-B)** and **2 (C-D)**.

**Fig.S7.** The recovery time for **1-2** films exposed to  $\text{NO}_2$  at varied concentration in the range of 0.1-0.85 ppm (exposure: 2 min).

**Fig.S8.** The time-dependent current evolution curves of the three toxic gases ( $\text{H}_2\text{S}$ ,  $\text{NH}_3$ , and  $\text{NO}_2$ ) in a sequential testing for LS films of **1(A)** and **(B)**.

**Fig.S9.** The response of the devices for compound **1(A)-2(B)** under 0.45 ppm  $\text{NO}_2$  exposure of 2 min and 10 min.

**Table S1.** The orientation angle of the phthalocyanine ring determined from polarized UV-vis absorbance of the LS films of compounds **1-2**.

**Table S2.** The gate-induced sheet carrier densities ( $n$ ) of the LS films of compounds **1-2**.

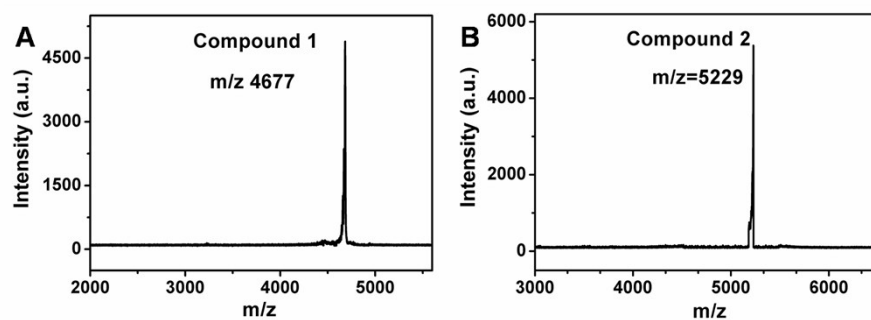

**Fig.S1.** Experimental isotopic pattern for the molecular ion of  $\text{Eu}_2[\text{Pc}(\text{OC}_8\text{H}_{17})_8]_2[\text{Pc}(\text{OCH}_2\text{CF}_3)_8]$  (A) and  $\text{Eu}_2\{\text{Pc}[(\text{OC}_2\text{H}_4)_3\text{OCH}_3]_8\}_2[\text{Pc}(\text{OCH}_2\text{CF}_3)_8]$  (B) shown in the MALDI-TOF mass spectrum.

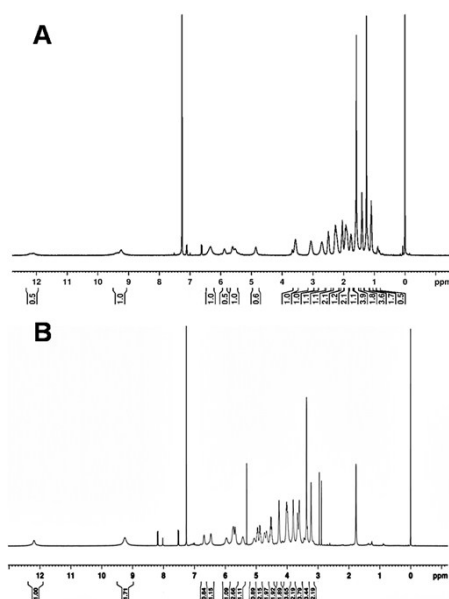

**Fig.S2.**  $^1\text{H}$  NMR spectrum of  $\text{Eu}_2[\text{Pc}(\text{OC}_8\text{H}_{17})_8]_2[\text{Pc}(\text{OCH}_2\text{CF}_3)_8]$  (A) and  $\text{Eu}_2\{\text{Pc}[(\text{OC}_2\text{H}_4)_3\text{OCH}_3]_8\}_2[\text{Pc}(\text{OCH}_2\text{CF}_3)_8]$  (B) in  $\text{CDCl}_3$ .

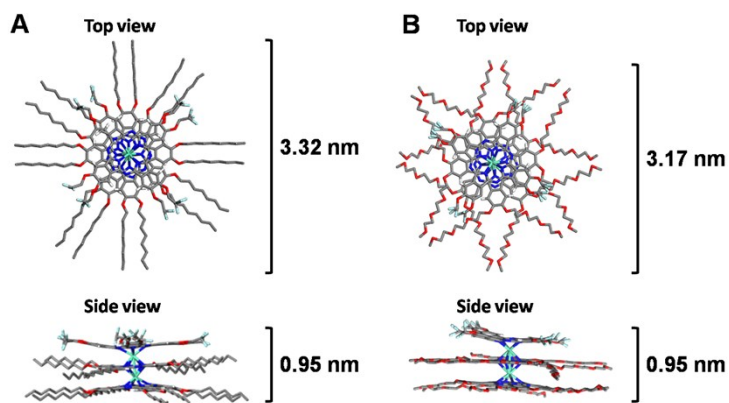

**Fig.S3.** The molecular dimension of  $\text{Eu}_2[\text{Pc}(\text{OC}_8\text{H}_{17})_8]_2[\text{Pc}(\text{OCH}_2\text{CF}_3)_8]$ (A): 3.32 nm (length)  $\times$  0.95 nm (height),  $\text{Eu}_2\{\text{Pc}[(\text{OC}_2\text{H}_4)_3\text{OCH}_3]_8\}_2[\text{Pc}(\text{OCH}_2\text{CF}_3)_8]$ (B) : 3.17 nm(length)  $\times$  0.95 nm (height) obtained using PCMODEL for windows Version 6.0, Serena Software.

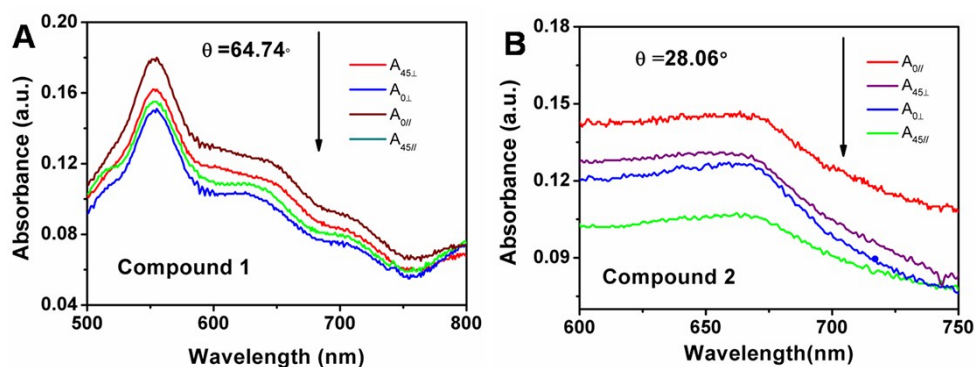

**Fig.S4.** Polarized UV-vis spectra of compounds 1-2 (A-B) LS films. 0 and  $45^\circ$  represent the angle between the light and the normal of the substrate, respectively, while “A// and A $\perp$ ” represent the absorbance for light polarized with the electric vector parallel and perpendicular to the dipping direction.

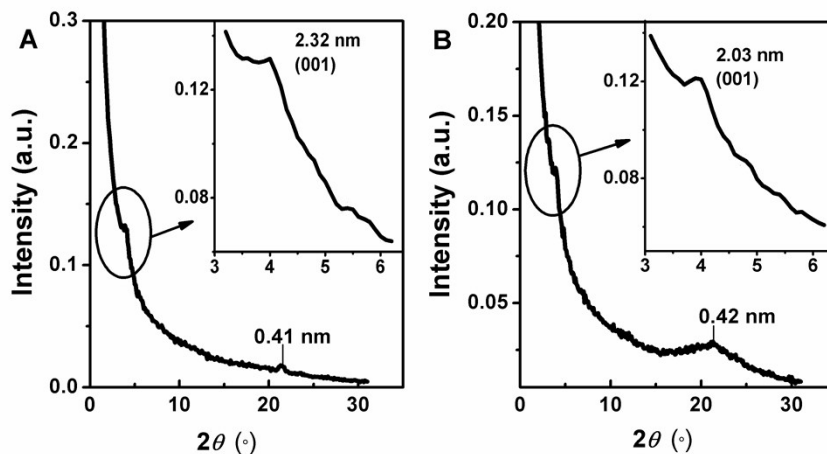

**Fig.S5.** XRD pattern recorded in in-plane (grazing incidence) mode for the LS films of **1**(A)-**2**(B).

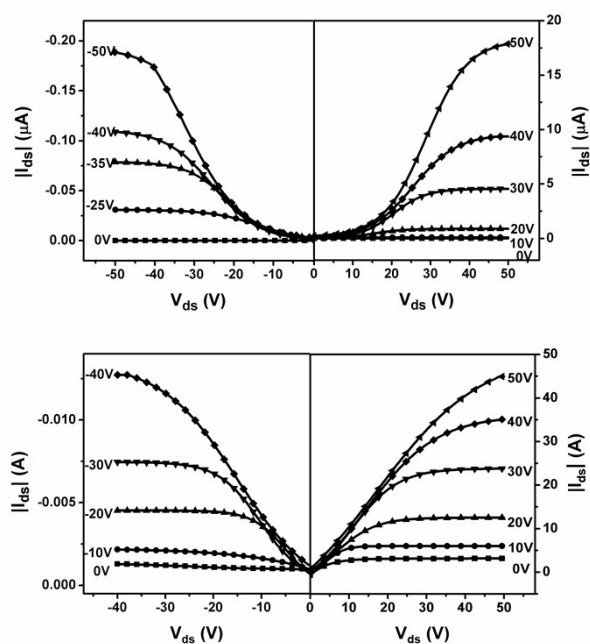

**Fig.S6.** Current–voltage output plots ( $I_{ds}$  vs.  $V_{ds}$ ) of ambipolar OFET device based on LS films of **1** (A) and **2** (B) deposited on HMDS-treated  $\text{SiO}_2/\text{Si}$  (300 nm) substrate with Au top contacts with various  $V_G$  for  $p$ -channel (left column of A and B) measured in air and for  $n$ -channel (right column of A and B) measured in  $\text{N}_2$ , respectively.

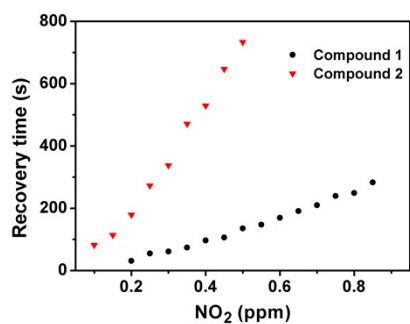

**Fig.S7.** The recovery time for **1-2** films exposed to NO<sub>2</sub> at varied concentration in the range of 0.1-0.85 ppm (exposure:2 min)

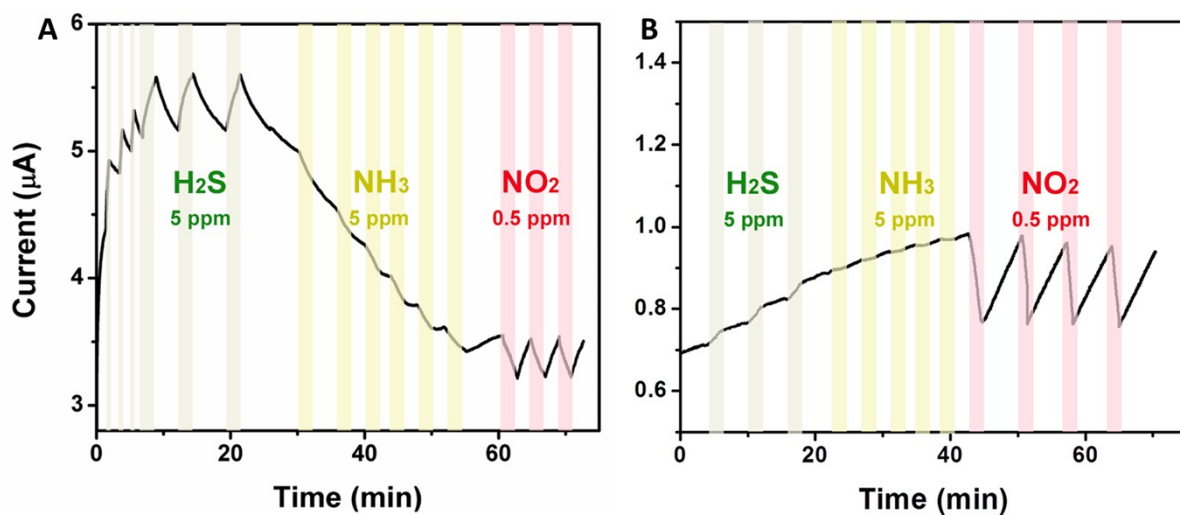

**Fig.S8.** The time-dependent current evolution curves of the three toxic gases (H<sub>2</sub>S of 5 ppm, NH<sub>3</sub> of 5 ppm, and NO<sub>2</sub> of 0.5 ppm) in a sequential testing for LS films of **1**(A) and **2**(B), the color columns represent exposure time.

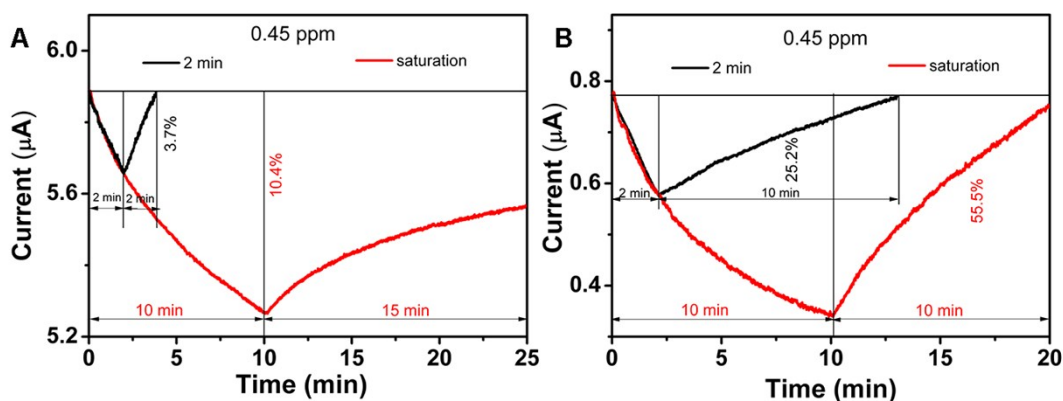

**Fig.S9.** The response of the devices for compound 1(A)-2(B) under 0.45 ppm NO<sub>2</sub> exposure of 2 min and 10 min.

**Table S1.** The orientation angle of the phthalocyanine ring determined from polarized UV-vis absorbance of the LS films of compounds 1-2.

| Compound | A//   | A⊥    | D 0°<br>(A//A⊥) | A//   | A⊥    | D 45°<br>(A// A⊥) | θ°   |
|----------|-------|-------|-----------------|-------|-------|-------------------|------|
| 1        | 0.156 | 0.162 | 0.96            | 0.150 | 0.179 | 0.84              | 64.7 |
| 2        | 0.145 | 0.127 | 1.14            | 0.106 | 0.131 | 0.81              | 28.1 |

**Table S2.** The gate-induced sheet carrier densities ( $n$ ) of the LS films of compounds 1-2.

| Cpds | $n_e/\text{cm}^{-2}$<br>(0 V) <sup>a</sup> | $n_h/\text{cm}^{-2}$<br>(0 V) <sup>a</sup> | $n_e/\text{cm}^{-2}$<br>(40 V) <sup>a</sup> | $n_h/\text{cm}^{-2}$<br>(40 V) <sup>a</sup> |
|------|--------------------------------------------|--------------------------------------------|---------------------------------------------|---------------------------------------------|
| 1    | $2.48 \times 10^{12}$                      | $8.31 \times 10^9$                         | $7.68 \times 10^{13}$                       | $1.03 \times 10^{12}$                       |
| 2    | $1.77 \times 10^{12}$                      | $8.01 \times 10^{10}$                      | $4.52 \times 10^{12}$                       | $3.90 \times 10^{12}$                       |

<sup>a</sup> Calculated from  $n = (I_{ds}/V_{ds})(L/W)(1/\mu e)$ , where  $I_{ds}$  is the source–drain current,  $V_{ds}$  the source–drain voltage,  $W$  the channel width(28.6 mm),  $L$  the channel length (0.24 mm),  $\mu$  the carrier mobility.

In the present system, the carrier densities were calculated at  $V_G=0$  V and 40 V, respectively. The values of  $(I_{ds}/V_{ds})$  is the slope values of linear region of output characteristics when  $V_G=0$  V and 40 V, respectively. As seen in Table S2, both  $n_e$  and  $n_h$  at 40 V are higher than  $n_e$  and  $n_h$  at 0 V, which means the gate voltage is an important influence factor of carrier densities. However, no matter 0 V or 40 V,

the  $n_e$  of **2** is always smaller than  $n_e$  of **1**, the  $n_h$  of **1** is always smaller than  $n_h$  of **2**. Note that in the main text, only the carrier densities at  $V_G=0$  V were listed in Table 2, representing an original status before gases inject.
